# Supplementary material for: Ameliorative effects of resveratrol against cadmium-induced nephrotoxicityviamodulating nuclear xenobiotic receptor response and PINK1/Parkin-mediated Mitophagy
Source: Royal Society of Chemistry journal article supplement (doi:10.1039/c9fo02287b), 2020-01-01
Supplement: c9fo02287b1.pdf [file c9fo02287b1.pdf]

## ***Supplemental Materials***

**Table S1. Animal groups**

| <b>Groups</b>     | <b>Number</b> | <b>Additive</b> | <b>Concentration</b>                  |
|-------------------|---------------|-----------------|---------------------------------------|
| Group 1 (Con)     | 20            | -               | -                                     |
| Group 2 (Resv)    | 20            | Resverotrol     | 400 mg/kg                             |
| Group 3 (Cd140)   | 20            | Cd              | 140 mg/kg                             |
| Group 4 (Cd+Resv) | 20            | Cd+Resverotrol  | 140 mg/kg Cd+400<br>mg/kg Resveratrol |

**Table S2. Sequences of oligonucleotide primers for qRT-PCR.**

| Gene Names | Sequence(5' → 3')                                 | NCBI Reference Sequence | Amplicon size (bp) |
|------------|---------------------------------------------------|-------------------------|--------------------|
| β-actin 1  | AGTACCCATTGAACACGGC<br>CTCCTCAGGGGCTACTCTCA       | AF199488                | 98                 |
| β-actin 2  | CATCAGGGTGTGATGGTTGGT<br>GGGGTACTTCAGGGTCAGGA     | AF199488                | 93                 |
| CYP1A1     | TTGCGTGTTTATCAACCAGT<br>CTTTGTTCACTTCGGTCCCTT     | NM_205146.2             | 113                |
| CYP1A4     | ATGCTCGTTTCAGTGCCTTCGT<br>GTGTCAAAGCCTGCCCCAA     | NM_205147.1             | 199                |
| CYP1A5     | CTATGACAAGAACAGCATCCGAGACT<br>CCCCAAAGATGTCATTACC | NM_001323211.1          | 138                |
| CYP1B1     | TTACCTCCATTCTCGTGCA<br>CAGCCTTATCAAGCAACTCCA      | XM_419515.4             | 150                |
| CYP2C18    | AACCTCCATACGAAGCTGCAA<br>TGTGCCTTTGAAGACTTTCTCA   | XM_004942105.1          | 243                |
| CYP2D6     | GGCGTTCCTGTTTCATGCTTT<br>TCGGTTTCTTCCAATCACCT     | NM_001195557.1          | 82                 |
| CYP3A4     | TCATAGTGTGTTCCCTT<br>GGTATCCTTCTCCCGTTC           | XM_414782.4             | 129                |
| CYP3A5     | AGCCTGCGGTTGTTGTCATG<br>CTTCAGCTAATGAGACAGCGTTTC  | NM_001001751.2          | 132                |
| CYP3A9     | ATGCTCGTTTCAGTGCCTTCGT<br>GTGTCAAAGCCTGCCCCAA     | NM_205147.1             | 199                |
| CAR        | ACTTCACCTGCCCCTTTGCC<br>CCTTCCTCATCCCCAGTCCA      | AB104462.1              | 105                |
| PXR        | CCCTCAAGAGCTACACATCGACCA<br>TGTTCTCCATCTTCAGCGTCT | EU153259.1              | 108                |
| AHR        | TTCAGGAAAGCAGAACAGCAA<br>TCACAATAATACGAAGCCAT     | NM_204118.2             | 96                 |
| SOD1       | TGTGCATGAATTTGGAGACAAC<br>TTGCAGTCACATTGCCGAG     | NM_205064.1             | 131                |
| SOD2       | TGCACTGAAATTCAATGGT<br>GTTTCTCCTTGAAGTTTGCG       | NM_204211.1             | 146                |

---

|                |                                                  |                |     |
|----------------|--------------------------------------------------|----------------|-----|
| SOD3           | TTTTCTCTAAAGATGGCAAG<br>CTTCCTGCTCATGGATCACAA    | XM_420760.3    | 109 |
| GCLC           | TCTGTAGATGATCGAACGC<br>TCCTTTATTAGGTGCTCGTAG     | XM_419910.4    | 176 |
| GCLM           | GCTGCTAACTCACAATGACC<br>TGCATGATATAGCCTTTGGAC    | NM_001007953.1 | 174 |
| HO-1           | GCTGAAGAAAATCGCCAA<br>ATCTCAAGGGCATTCAATCGG      | NM_205344.1    | 135 |
| NQO1           | CTCCGAGTGCTTTGTCTACG<br>AATGGCTGGCATCTCAAACC     | XM_015874307.1 | 151 |
| Nrf2           | CTGCCAAAACTGCCGTA<br>TCAAATCTTGCTCCAGTTCCA       | NM_205117.1    | 60  |
| GST            | GATGAACGTCGTCCAACCAG<br>TCATGTCCGTGGTCCTTCAA     | NM_001001777.1 | 117 |
| GSTA2          | TCACTGAACGAGCTACAACC<br>TGCCAACAAGATAATCCTGACC   | NM_001001776.1 | 216 |
| GSTA3          | ACAATCTCTACGGGAAAGACCT<br>TGCCAACAAGATAATCCTGACC | XM_015284821.2 | 216 |
| GSTA4          | GCTACATCGCAGGGAAATACA<br>TGGAGAGAAAGGAAACACCAA   | NM_204818.2    | 122 |
| GSTM2          | GACTTCCCAACCTGCCCTA<br>CTGCTTCTCCACCTCCGTCT      | NM_205090.1    | 120 |
| GSTO1          | TTCCAAGGCACTCAAAGAAGG<br>TCCCCACCATAAAACACAGT    | XM_015288649.2 | 118 |
| GSTT1          | ACCACAGCCATCAGAGAAGC<br>GCCAAGGAAATCTCGTCCC      | NM_205365.1    | 120 |
| UGT1A1         | GACTCGTGCCTTTATTACCCAT<br>TACTCGTTTCGATTGTCCA    | XM_015289252.2 | 118 |
| SIRT1          | TGCTCCCAGAAACAATCCC<br>CCTGTAGAAGTTTACC GCATC    | XM_051866378.1 | 141 |
| PGC-1 $\alpha$ | TACAGCAATGAGCCTGCCAA<br>AGGCAATCCATCCTCATCCAC    | XM_015862904.1 | 117 |
| NRF1           | CAGTATAGCACACCTGGTACCCTC<br>CTCCGATGCCTGCGTTGTCT | XM_015856007.1 | 247 |

---

---

|        |                                                    |                |     |
|--------|----------------------------------------------------|----------------|-----|
| TFAM   | GAAACGTGGCAAATCTATCCG<br>AGGTCTTCGCGTCCAAGCTC      | XM_015866188.1 | 131 |
| Cyt C  | CTGAGGGCTTCTTTACACA<br>TTCTTCTTGATACCCGCAAA        | XM_015281453.2 | 136 |
| VADC1  | GCCTGAAGCTGACTTTTGACTCC<br>GATGTGCTCCCTTTGTATCCTGT | XM_015875804.1 | 89  |
| SIRT3  | ATAGACCCAACACTACGCCACT<br>TTGTCTGCCATAACGTCTCCC    | XM_015863373.1 | 217 |
| PRDX3  | TTCAAGGGGAAATACCTCGTGCTC<br>AGTCCACAGAAACCGCCACC   | XM_426543.5    | 139 |
| Mfn1   | GACAGCGATCTACATCCACCA<br>TCTTCCCTCAAACAAAATCGT     | XM_01553014.1  | 134 |
| Mfn2   | TGCTCCAGAAAATCCC<br>TGCTCCAGAAACAATC               | XM_0517678.1   | 147 |
| OPA1   | GATAAGCCGCACCAAAGAGC<br>TGCTACTTCATCATTTGCCAGA     | NM_001039309.1 | 112 |
| MFF    | GAAACGTGGCAAATCTATCCG<br>AGGTCTTCGCGTCCAAGCTC      | XM_015566188.1 | 124 |
| Parkin | GTCCAGCAAAGCATCGTTCA<br>CAACGATGGAAGGATGCTGG       | XM_419615.6    | 159 |
| p62    | GACCCAGCCAAGACTACCAT<br>CAGAGGCATGTAGTTTCGGC       | XM_003642061.4 | 240 |
| Bnip3  | CATTACTTCATGCTGCGCCT<br>CAAAGCAACCCAAGCCATCT       | NM_001030885.2 | 182 |
| LC3I   | TTACACCCATATCAGATTCTTG<br>ATTCCAACCTGTCCCTCA       | XM_417327.6    | 143 |
| LC3II  | AGTGAAGTGTAGCAGGATGA<br>AAGCCTTGTAACGAGAT          | NM_001031461.1 | 193 |

---

**Fig 1-S1. Effect of resveratrol on Cd-induced renal function**

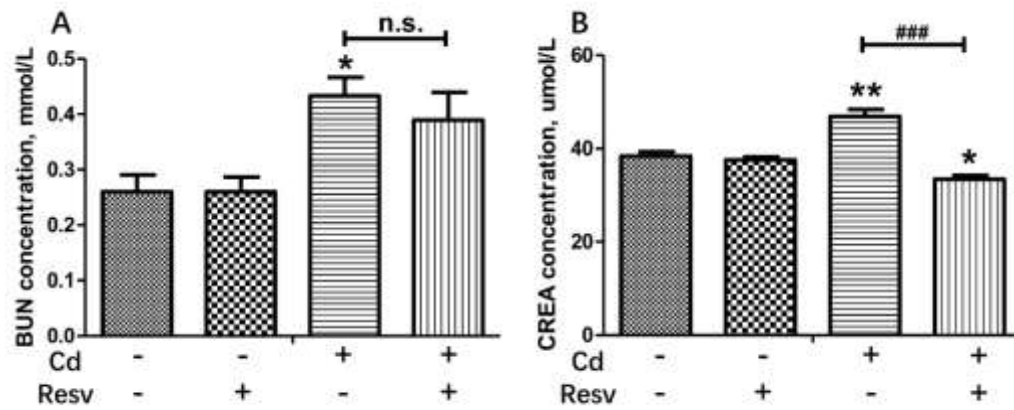

**Fig 1-S1.** Effect of resveratrol on Cd-induced renal function. (A) BUN concentration. (B) CREA concentration. Data was presented as the means  $\pm$  SD. Compared with the Con group: \* $P$ <0.05 and \*\*\* $P$ <0.01. Compared with Cd140 group: n.s., no significant difference and ### $P$ <0.001. Cd (-/+): 0/140 mg/kg Cd exposure. Resv (-/+): 0/400 mg/kg resveratrol supplement.

**Fig 4-S1. Nrf2 relative mRNA expression**

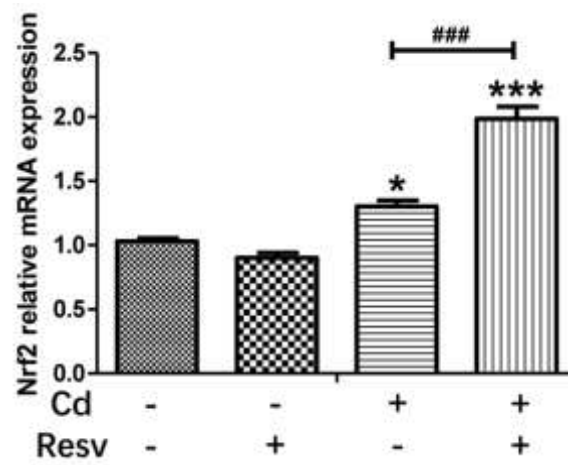

**Fig 4-S1.** Nrf2 relative mRNA expression. Data was presented as the means  $\pm$  SD. Compared with the Con group: \* $P$ <0.05 and \*\*\* $P$ <0.001. Compared with Cd140 group: ### $P$ <0.001. Cd (-/+): 0/140 mg/kg Cd exposure. Resv (-/+): 0/400 mg/kg resveratrol supplement.

**Fig 5-S1. PGC-1 $\alpha$  relative mRNA expression**

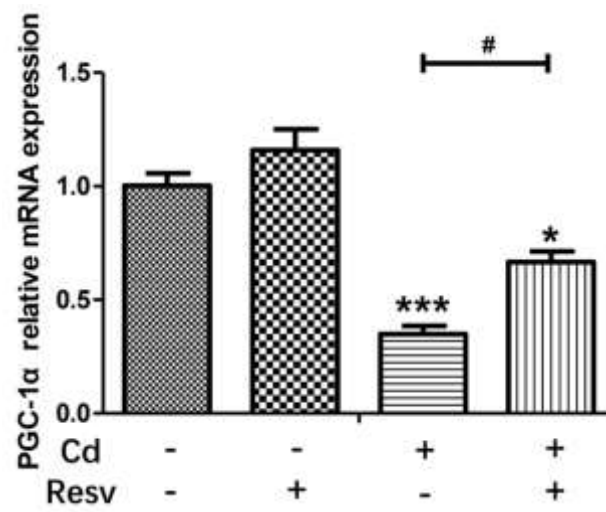

**Fig 5-S1.** PGC-1 $\alpha$  relative mRNA expression. Data was presented as the means  $\pm$  SD. Compared with the Con group: \* $P$ <0.05 and \*\*\* $P$ <0.001. Compared with Cd140 group: ### $P$ <0.001. Cd (-/+): 0/140 mg/kg Cd exposure. Resv (-/+): 0/400 mg/kg resveratrol supplement.
